# Supplementary material for: Homologous bd oxidases share the same architecture but differ in mechanism
Source: PubMed Central journal article supplement (PMC6853902; doi:10.1038/s41467-019-13122-4), 2019-11-13
Supplement: 41467_2019_13122_MOESM1_ESM.pdf [file 41467_2019_13122_MOESM1_ESM.pdf]

# Supplementary Information

## **Homologous *bd* oxidases share the same architecture but differ in mechanism**

Alexander Theßeling, Tim Rasmussen et al.

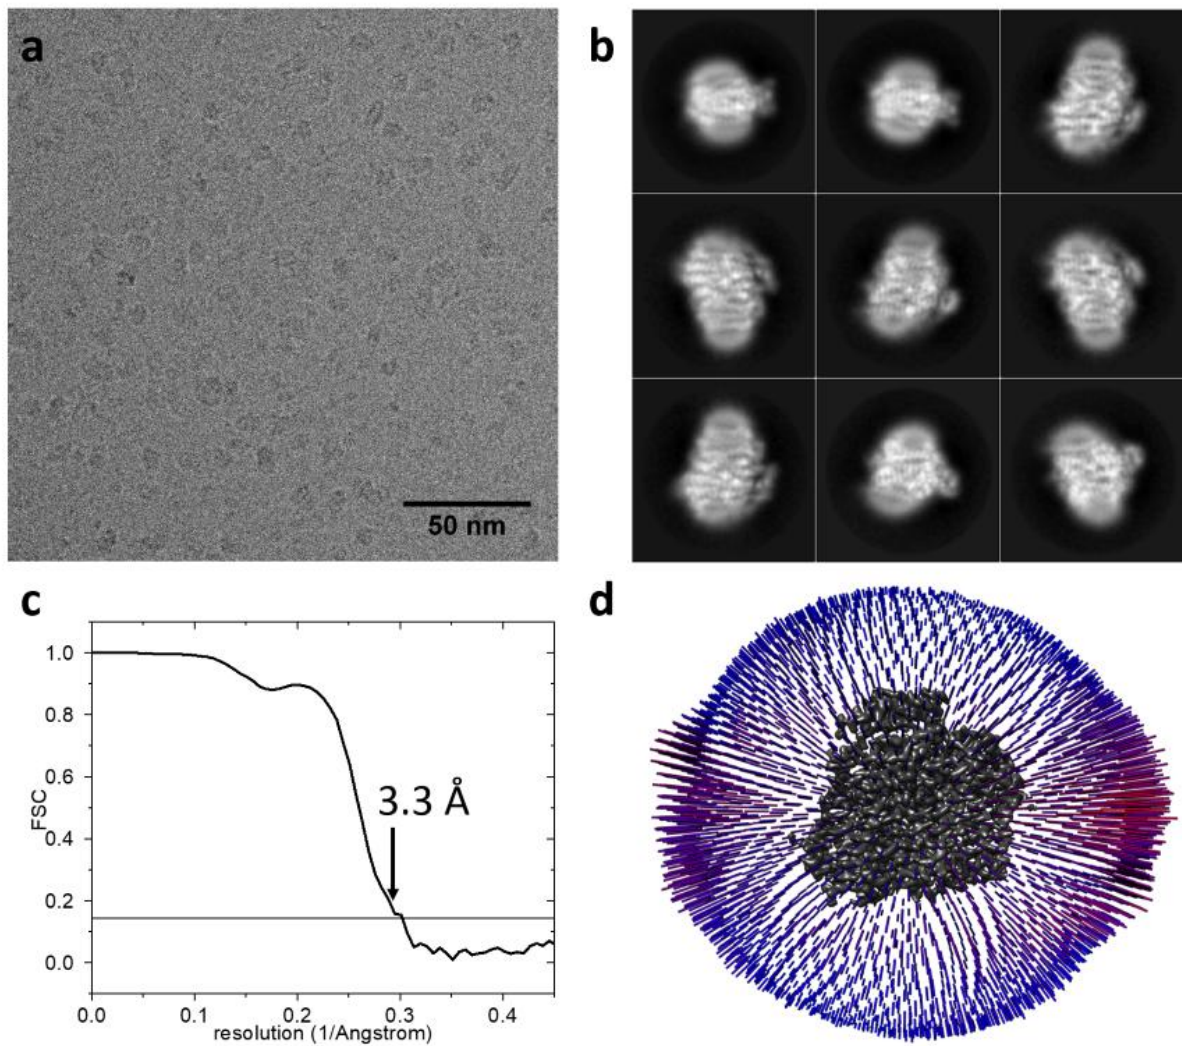

**Supplementary Figure 1 | Cryo-electron microscopy on the *bd* oxidase.** (a) cryo-EM micrograph of *bd* oxidase. (b) examples of 2D classes of the *bd* oxidase. The edge of each image corresponds to 150 pixels (159.6 Å). (c) Fourier Shell Correlation plot. The overall resolution was determined according to the „gold standard“ from independently processed half-sets to 3.3 Å as implemented in Relion. (d) Angular distribution of particles contributing to the final reconstruction.

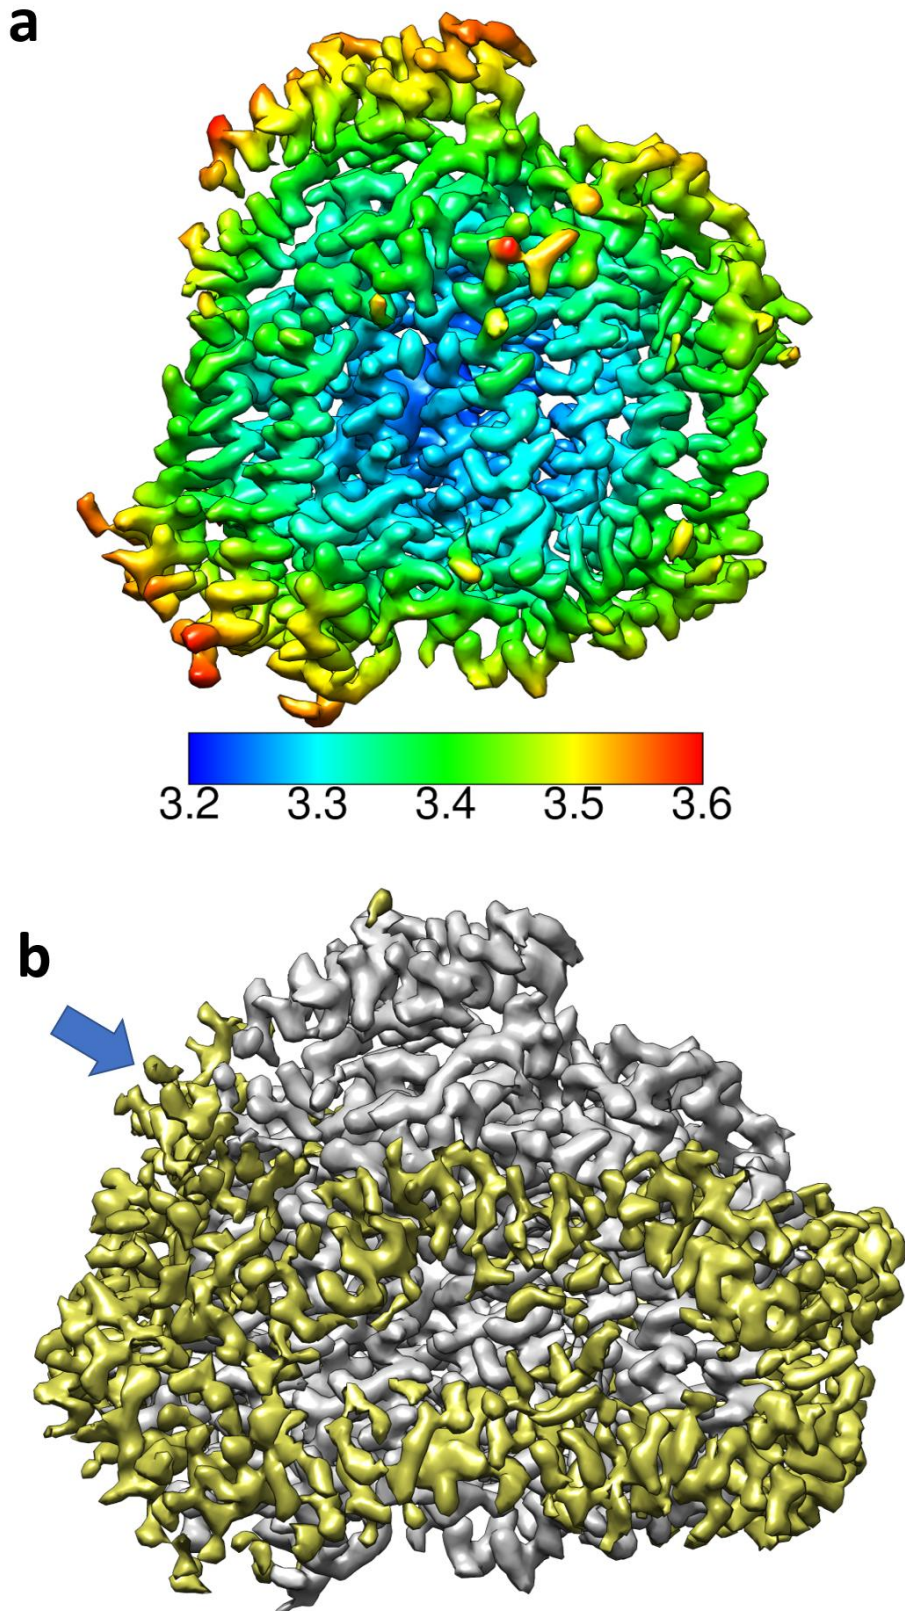

**Supplementary Figure 2 | Local resolution and membrane localisation.** (a) Local resolution (in Å) of *bd* oxidase map determined with the locres tool in relion postprocess. (b) The noise belt (yellow) is seen at a lower threshold and was not modelled. It is caused by lipids and amphipol molecules and indicates the attachment region of the membrane. In addition, the unresolved Q-loop causes noise (arrow).

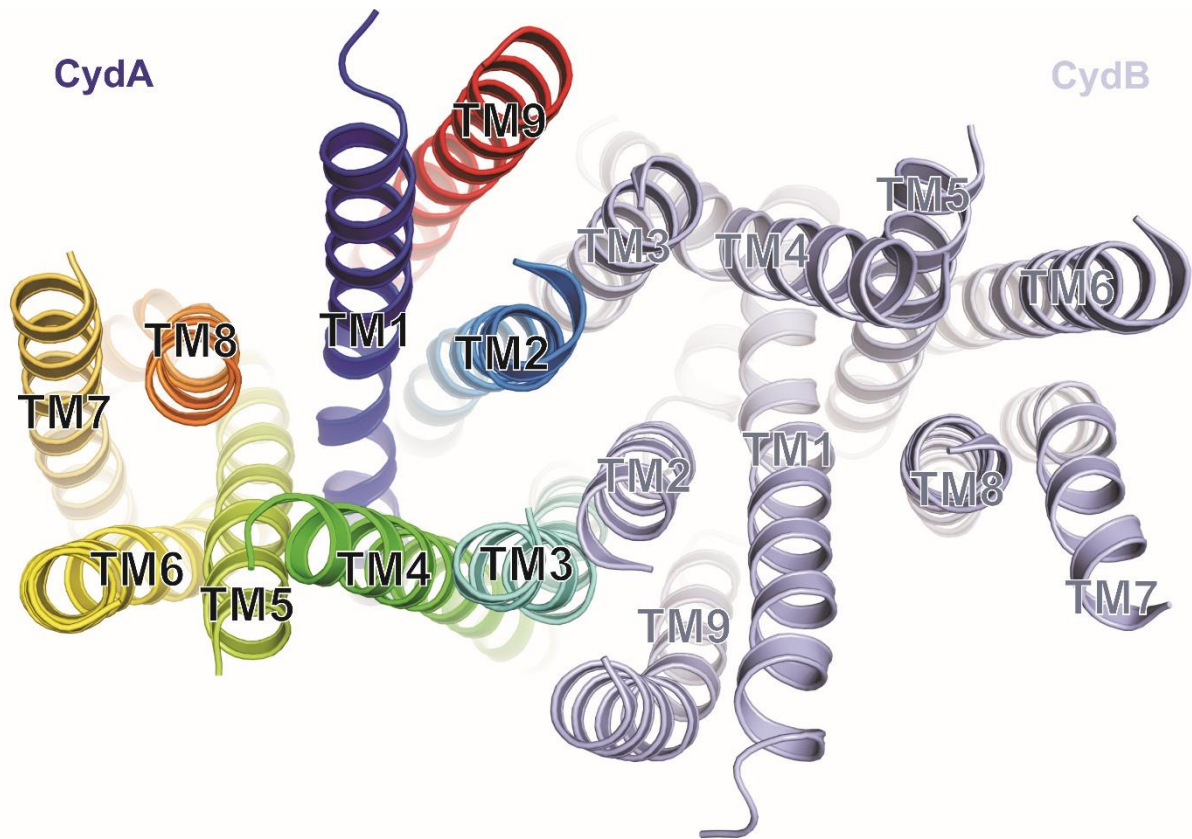

**Supplementary Figure 3 | Transmembrane architecture of *E. coli* bd oxidase.** View from periplasmic side. Transmembrane helices are assigned consecutive numbers TM1-TM9. Note, periplasmic loops have been removed here for clearer illustration. CydA is given in rainbow colors from N-terminus (dark blue) to C-terminus (red), while CydB is shown in light blue.



## A) Alignment of CydA

|        |     |               |                 |               |               |               |                 |                 |     |
|--------|-----|---------------|-----------------|---------------|---------------|---------------|-----------------|-----------------|-----|
| Ec     | 1   | --MLDIVELS    | RLQFALTAMY      | HFLFVPLTLG    | MAFLLAIMET    | VYVLSGKQIY    | KDMTKFWGKL      | FGINFALGVA      | 68  |
| Gt     | 1   | MNGYDFVLLS    | RILTELTLTV      | HIIYATIGVG    | VPLMIAIAQW    | VGIRKNDMHY    | ILLARRWTRG      | FVITVAVGVV      | 70  |
|        |     | * * * *       | * : * *         | * : : : : : * | * : : : : : * | * : . . . *   | : : * :         | * * . . * : : * |     |
| Ec     | 69  | TGLTMEFQFG    | TNWSYYSHYV      | GDIFGAPLAI    | EGLMAFFLES    | TFVGLFFFGW    | DRLG-KVQHM      | CVTWLVALGS      | 137 |
| Gt     | 71  | TGTAIGLQLS    | LLWPNFMQLA      | GQVISLPLFM    | E-TFAFFFEA    | IFLGIYLYTW    | DRFENQKHL       | LLLIPVAIGS      | 139 |
|        |     | ** : : : *    | * . : : .       | * : : . * *   | * : * * * : * | * : * : : : * | ** : : : *      | : * * * :       |     |
| Ec     | 138 | NLSALWILVA    | NGWMQNPIAS      | DFNFETMRME    | MVSFSELVLN    | PVAQVKFVHT    | VASGYVTGAM      | FILGISAWYM      | 207 |
| Gt     | 140 | SASAMFITMV    | NAFMNTPQG-      | -FELKNGELV    | NIDPIVAMFN    | PAMPTKVAHV    | LATSVMYTSF      | VLASIAAWHL      | 207 |
|        |     | . * * : * *   | * . : * . *     | * : : . . :   | . : . : * *   | * . . * . *   | * : . * : * . * | . : . * : * * : |     |
|        |     |               |                 |               |               | L             | Q-loop          |                 |     |
| Ec     | 208 | LKGRDFAFAK    | RSFAIAASFG      | MAAVLSVIVL    | GDESGYEMGD    | VQKTKLAAIE    | AEWETQPAPA      | AFTLFGIPDQ      | 277 |
| Gt     | 208 | WKGNRHIYHR    | KALHLTMKTA      | FIFSVASALV    | GDLGKFLAE     | YQPEKLAAAE    | WHFETS-SHA      | PLILFGTLE-      | 275 |
|        |     | ** . . : : :  | : : : : . .     | : : : : :     | ** * * : :    | * * * * *     | . : * * . : *   | . : * * * :     |     |
| Q-loop |     |               |                 |               |               |               |                 |                 |     |
| Ec     | 278 | EEETNKFAIQ    | IPYALGIIAT      | RSVDTPVIGL    | KELMVQHEER    | IRNGMKAYSL    | LEQLRSGSTD      | QAVRDQFNSM      | 347 |
| Gt     | 276 | EDNEVKYALE    | IPYALSILAH      | NHPAAVVTVGL   | NDIPEDERPP    | LY-----       | -----           | -----           | 317 |
|        |     | * : : * : * : | * * * * . * : * | . : * * *     | : : : . .     | :             |                 |                 |     |
|        |     |               |                 |               |               |               |                 |                 |     |
|        |     |               |                 |               |               |               |                 |                 |     |
| Ec     | 348 | KKDLGYGLLL    | KRYTPNVADA      | TEAQIQQATK    | DSIPRVAPLY    | FAFRIMVACG    | FLLLAIIALS      | FWS-VIRNRI      | 416 |
| Gt     | 318 | -----         | -----           | -----         | -----IH       | YLFDMVTIG     | VFLMVVAAYV      | WLGSIFRWKW      | 349 |
|        |     |               |                 |               |               | : : * * * * * | . : * : : * :   | : . : * :       |     |
| Ec     | 417 | GEKKWLLRAA    | LYGIPLPWIA      | VEAGWFVAEY    | GRQPWAIGEV    | LPTAVANSSL    | TAGDLIFSMV      | LICGLYTLFL      | 486 |
| Gt     | 350 | TAKNWFGLL     | VAGGPLAMIA      | IEAGWYLAEV    | GRQPWILRGY    | MKTAEG--AT    | TSAHVDTMLV      | LFCLLYIVLV      | 417 |
|        |     | * : * : :     | : * * * . *     | : * * * : * * | * * * * :     | : * * . :     | * : . . : *     | * : * * * : :   |     |
| Ec     | 487 | VAELFLMFKF    | ARLGPSLKT       | GRYHFEQSST    | TTQPAR        | 522           |                 |                 |     |
| Gt     | 418 | IASATVLIRM    | FRRNP----       | VERELEERAN    | RGEVAP        | 448           |                 |                 |     |
|        |     | * . : : : :   | * . *           | . . * : : .   | : *           |               |                 |                 |     |

## Alignment of CydB

|    |     |             |             |               |               |             |               |             |     |
|----|-----|-------------|-------------|---------------|---------------|-------------|---------------|-------------|-----|
| Ec | 1   | MIDYEVLRFI  | WLLLVGVLLI  | GFAVTDGDFDM   | GVGMLTR---    | FLGRNDTERR  | IMINSIAPHW    | DGNQVWLITA  | 67  |
| Gt | 1   | ----MTLEVI  | GISVLWLFLE  | GYIIVASIDF    | GAGFFSVYSH    | WANQQHILHR  | IIQRYLSPVW    | EVTNVFLVFF  | 66  |
|    |     | . * . *     | : : : * :   | * : . . . * : | * * : : :     | : . . . : * | * : . : * * : | . : * : * : |     |
| Ec | 68  | GGALFAAWPM  | VYAAAFSGFY  | VAMILVLASL    | FFRPVGFDFYR   | SKIEETRWRN  | MWDWGIFIGS    | FVPP--LVI   | 134 |
| Gt | 67  | FVGIVGFFPK  | TAYYYSILL   | VPASIAIVLL    | AIRGSYYAFH    | TYGETERNWY  | LLAYG-LTGL    | FIPASLSIVL  | 135 |
|    |     | . . . . *   | . * :       | * . : . . *   | * * : : :     | : * * :     | : * : * *     | * : * . : * |     |
| Ec | 135 | GVAFGNLLQG  | VPFNVDEYLR  | LYYTGNNFFQL   | LNPFGLLAGV    | VSVGMIITQG  | ATYLMQRTVG    | ELHLRTRATA  | 204 |
| Gt | 136 | TISEGGFVEE  | SAAGVALDYG  | KLFAS-----    | --PLSWSVVL    | LSVTSVLYIS  | AVFLTYADA     | AGDEQARALL  | 198 |
|    |     | : : * : : : | . . *       | : . .         | * : . . : *   | : * * : .   | * : * * :     | . : * * :   |     |
| Ec | 205 | QVAALVTLVC  | FALAGVWVMY  | GIDGYVVKST    | MDHYAASNPL    | NKEVVREAGA  | WLVNFNNTPI    | LWAIPALGVV  | 274 |
| Gt | 199 | RRYALLWSP   | TMLSALLIY   | QLR----YHN    | PEHYDN----    | -----       | ---LWN---V    | AWMLVISFLF  | 244 |
|    |     | : * * :     | * : : : * : | : .           | : * *         |             | : * :         | * : : . :   |     |
| Ec | 275 | LPLLTILTAR  | MDKAAWAFVF  | SSLTLACIIL    | TAGIAMFPFV    | MPSSTMMNAS  | LTMWDATSSQ    | LTLNVTWVA   | 344 |
| Gt | 245 | FVITVWLLGR  | QRRFGWAFIA  | LLFYQAFAPY    | AYGISHYPYL    | LYPYLTIYDG  | FTN-ETMAMA    | LIVAFIAGLL  | 313 |
|    |     | : . . * . * | : . * * * : | : * :         | : * * : * : : | : . : .     | : * : : :     | * : . : : : |     |
| Ec | 345 | VVLVPIILLY  | TAWCYWKMFG  | RITKEDIERN    | THSLY         | 379         |               |             |     |
| Gt | 314 | LLIPSLYLLM  | RLFLFNKAYV  | KGKWEKGK-     | -----         | 342         |               |             |     |
|    |     | : : : . * * | : : * :     | : . * . :     |               |             |               |             |     |

## Alignment of CydX

```
Ec      1  MWYFAWILGT LLACSFQVIT ALALEHVESG KAGQEDI 37
Gt      1  MQTFLIMYAP MVVVALSVVA AFWVG-LKDV HVNE--- 33
      * * : .. :.. :..*: : * : : : : .. :
```

## B) Alignment of the Q-loop sequence

```
Ec      249  QKTKLAAIE AEWETQPAPA AFTLFGIPDQ EEETNKFAIQ IPYALGIIAT RSVDTVPVIGL KELMVQHEER 317
Gt      249  QPEKLAAAE WHFETS-SHA PLILFGTLEE DNEV-KYALE IPYALSILAH NHPAAVVTGL NDIPEDERPP 315
      * **** * ..** : * .. ** : : :*. *:: :****.*: * . : * ** : : : .. :
```

```
Ec      318  IRNGMKAYSL LEQLRSGSTD QAVRDQFNMS KKDLGYGLLL KRYTPNVADA TEAQIQQATK DSI 380
Gt      316  L----- - - - - - - - - - - - - - - - - - - - - - - - - - - - - - 317
      :
```

## C) Alignment of *E. coli* CydA and CydB

```
CydA    1  MLDIVELSRSL QFALTAMYHF LFPVPLTLGMA FLAIMETVY VLSGKQIYKD MTKFWGKFLG INFALGVATG 70
CydB    1  -----MI DYEVLRFIWW LLVGVLL--- - - - - - - - - - - - - - - - - - - - - - - - IGFAVTDG 27
      : : : : : *: * : *
      : .. : * . : .. ** : : : * * : : : * * : : : *

CydA    71  LTMEFQFGTN WSYSHYVGD IFGAPLAI EG LMAFFLESTF VGLFFFQWDR LGKVQHMCVT WLVALGSNLS 140
CydB    28  FDMGVGMLTR FLGRNDTERR IMINSIAPH- - - - - - - - - - - - - - - - - WDG N-----QV WLITAGGALF 72
      : * . : * . : .. *: : * . : .. ** : : : * * : : : * *

CydA    141  ALWILVANGW MQNPIASDFN FETMRMEMVS FSELVLNPVA QVKFVHTVAS GYVTGAMFIL GISAWYMLKG 210
CydB    73  AAWPVYAAA FSG----- --FVAMILV LASLFFRPVG FDYRSKIEET RWRN--MWDW GIFIGSFVPP 131
      * * :* . : .. : : : : * . * * : :

CydA    211  RDFAFAKRSF AIAASFGMAA VLSVIVLGDE SGYEMGDVQK TKLAAIEAEW ETQPAPAAFT LFGIPDQEEE 280
CydB    132  LVIGVAFGNL LQGVFPNVE YLRLYYTGN- - - - - - - - - - - - - - - - - - - - - - - - - - - 160
      : .. * : : .. * : : * : * :

CydA    281  TNKFAIQIPY ALGIIATRSV DTPVIGLKEK MVQHEERIRN GMKAYSLEEQ LRSSTQAV RDQFNMSMKKD 350
CydB    161  ---FFQLLN PFGLLAG--- ---VSVGMI ITQGATYLQ M RTVG-ELHLR TRATAQVAAL VTLVCFALAG 219
      : * : .. * : * : : * : : : * : : * : :

CydA    351  LGYGLLLKRY TPNVADATEA QIQQATKDSI PRVAPLYFAF RIMVACGFL LALIALSFWS VIRNRIGEEK 420
CydB    220  VVVMYGDIGY VVKSTMDHYA ASNPLNKEVV REAGAWLVNF NNTPIILWAI ALGVVLP LLT ILTARMDKAA 289
      : : .. * . : : * : : * : : * . : : : * : : : : * : :

CydA    421  WLLRAALYGI PLPWIAVEAG WFVAEYGRQP WAIGEVLP TA VANSSTLAGD LIFSMVLICG LYTLFLVAEL 490
CydB    290  WAF--VFSSL TLACIILT AG IAMPFVMPMS STMMNASLTM WDATSSQLTL NVMTWVAVVL VPIILLYTAW 357
      * : : : . * . * * : : : * : * : : : * : :

CydA    491  FLMFKFARLG PSSLKTGRYH FEQSSTTTQP AR 522
CydB    358  CYWKMFGKIT KEDIERNTHS LY----- -- 379
      *.* : : : : :
```

**Supplementary Figure 4 | Sequence comparisons of *bd* oxidase.** A) Comparison between CydA, CydB and CydX/S from *E. coli* and *G. thermodenitrificans*, Ec: *E. coli*; Gt: *G. thermodenitrificans*; \*, identical; :, conserved substitutions; ., semi-conserved substitutions; L, linker; Q-loop, amino acids contained within the *E. coli* Q-loop region; red letters, *E. coli* residues 263 to 302 not resolved in the structure, most likely due to their high flexibility, B) comparison between the Q-loop sequence from *E. coli* and *G. thermodenitrificans* and C) comparison between *E. coli* CydA and CydB. The sequence alignment was generated by ClustalW ([www.genome.jp/tools-bin/clustalw](http://www.genome.jp/tools-bin/clustalw)).

A)

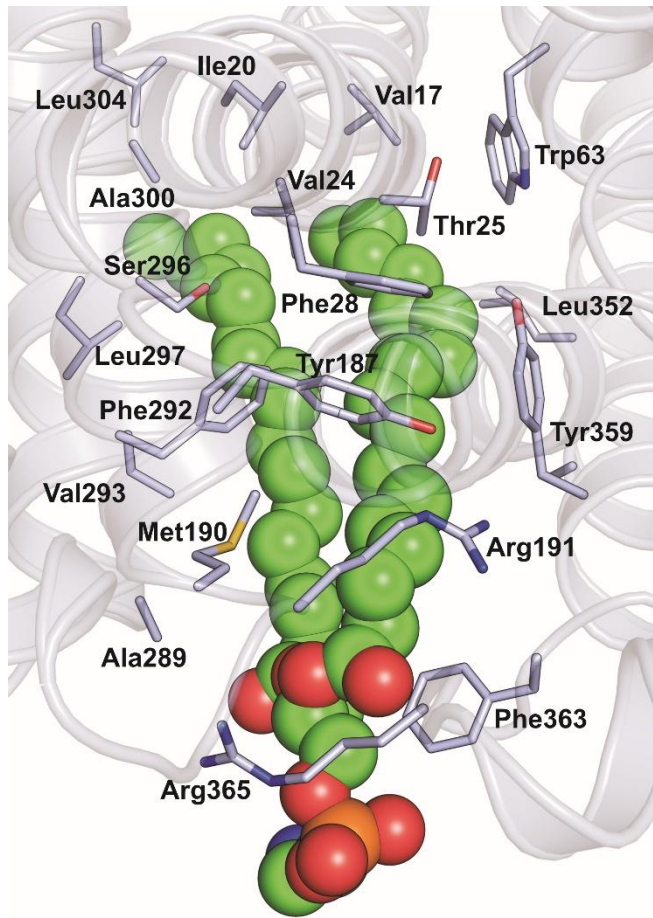

B)

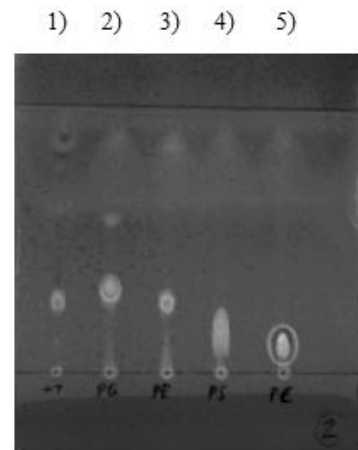

**Supplementary Figure 5 | Distearoyl glycerophosphoethanolamine is bound by numerous amino acid side chains of CydB.** A) At the cytoplasmic side (bottom) Arg365 binds to the phosphate group. An alternative head group binding site may be provided by Arg191. B) The polar head group was identified by TLC ethanolamine. Lane 1: Extract from sample, 2: phosphatidylglycerol, 3: phosphatidylethanolamine, 4: phosphatidylserine and 5: phosphatidylcholine.

A)

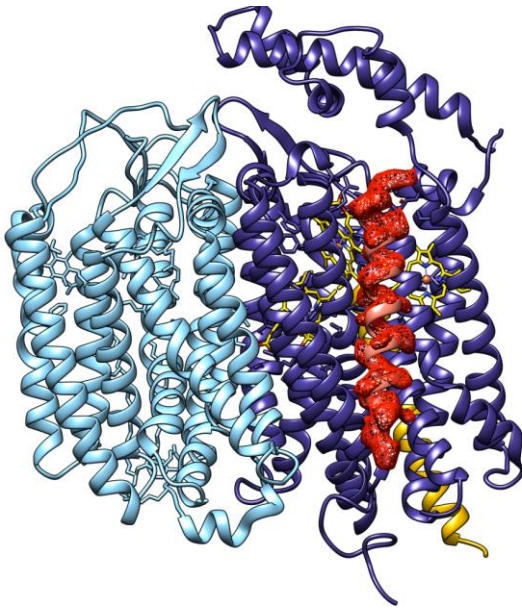

B)

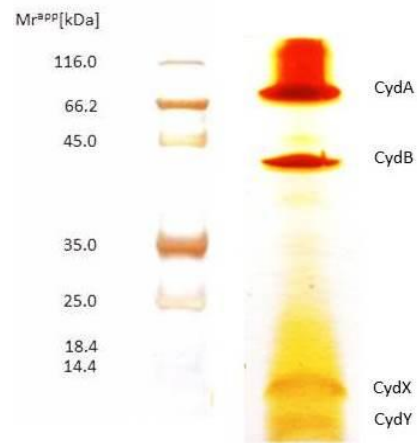

C)

|       |   |                    |            |            |     |
|-------|---|--------------------|------------|------------|-----|
| ECOLI | 1 | <b>MSTDLKFS</b> LV | TTIIVLGLIV | AVGLTAALH- | 29  |
| SALTY | 1 | MSTDLKFSLI         | TTLIVLGVIV | AGGLTAALH- | 29  |
| EDWTA | 1 | MESDLKYSLV         | TTVVALSLIV | VAGLIVALH- | 29  |
| PHOPR | 1 | MEADLKFALI         | TTGVVFAILI | GFGLTAIGA- | 29  |
| ENT38 | 1 | MSTDLKYSLI         | TTVIVLSLIV | FGGLTAALH- | 29  |
| ENTCL | 1 | MSTDLKYSLF         | TTVIVLSVIV | FGALTAALH- | 29  |
| CITCO | 1 | MSTDLKFSLV         | TTIIVLGLIV | AGGLTAALN- | 29  |
| KLEPN | 1 | MDTNLKFSLI         | TTIIALGVIV | AFSLTAILH- | 29  |
| PANSA | 1 | MSTDLKFSLI         | TTVGALLMII | AFSFTAILH- | 29  |
| SERPR | 1 | MDTLKMSLF          | TTVCALAVII | AFSFTAALN- |     |
| VIBHA | 1 | MEHDLKSALL         | IVVTIFAVLL | SFGIIAITTA | 30  |
|       |   | *. . .* :*         | . :        | : ::       | . : |

**Supplementary Figure 6 | Presence of YnhF in the preparation and in the structure of *E. coli bd oxidase*.** A) An unidentified membrane protein was seen as weak density of a TM helix (red mesh) in front of the portal towards the heme  $b_{595}$ . This blocks access of dioxygen to this heme. CydA is shown in dark blue, CydB in light blue and CydX in orange. The positions of the heme groups are indicated. B) The preparation of *E. coli bd oxidase* contains a fourth protein of the expected molecular mass of about 3 kDa. C) Sequence alignment of YnhF and homologous proteins. The residues within the *E. coli* sequence shown in red were found by mass spectrometry of the corresponding band from the gel identifying the protein as YnhF. We propose to re-name YnhF to CydY. The sequence alignment was generated by ClustalW ([www.genome.jp/tools-bin/clustalw](http://www.genome.jp/tools-bin/clustalw)) using the same symbols as in Supplementary Fig. 4. Organism codes are from UniProtKB/Swiss-Prot ([www.uniprot.org/docs/speclist](http://www.uniprot.org/docs/speclist)).



**(A)**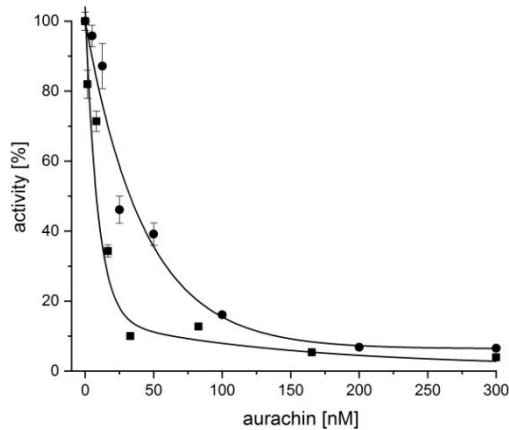**(B)**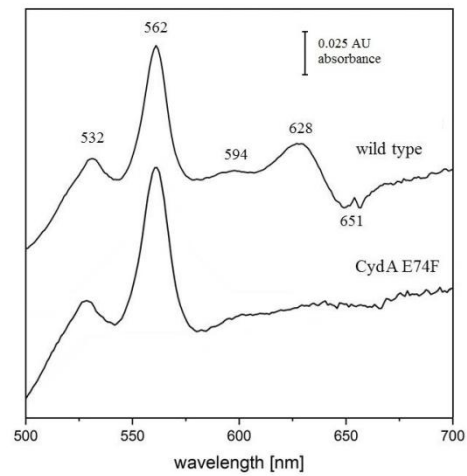

**Supplementary Figure 7 | Inhibition of *bd* oxidase by aurachin C and D and UV-vis difference spectrum of the E74F<sup>A</sup> variant.** (A) Inhibition A of the duroquinol: dioxygen oxidoreductase activity of *bd* oxidase by aurachin C (filled squares) and D (filled circles). The apparent IC<sub>50</sub> values derived from the curve are 12 and 35 nM, respectively. Activities were determined from three biological replicates. Error bars represent standard deviations. The error bars are equivalent throughout the figure. (B) UV-vis (dithionite-reduced) minus (air-oxidized) difference spectrum of a detergent extract of membranes from the parental strain and the E74F<sup>A</sup> mutant. The conserved E74<sup>A</sup> is located at the interface between CydA and CydB at the level of heme d in the *E. coli* *bd* oxidase. The extract from the mutant is lacking the absorbances of heme d at 628 and 651 nm, while the absorbance of heme b<sub>595</sub> is slightly reduced and perturbed. Attempts to purify the *bd* variant from the mutant strain failed due to a disintegration of the complex.

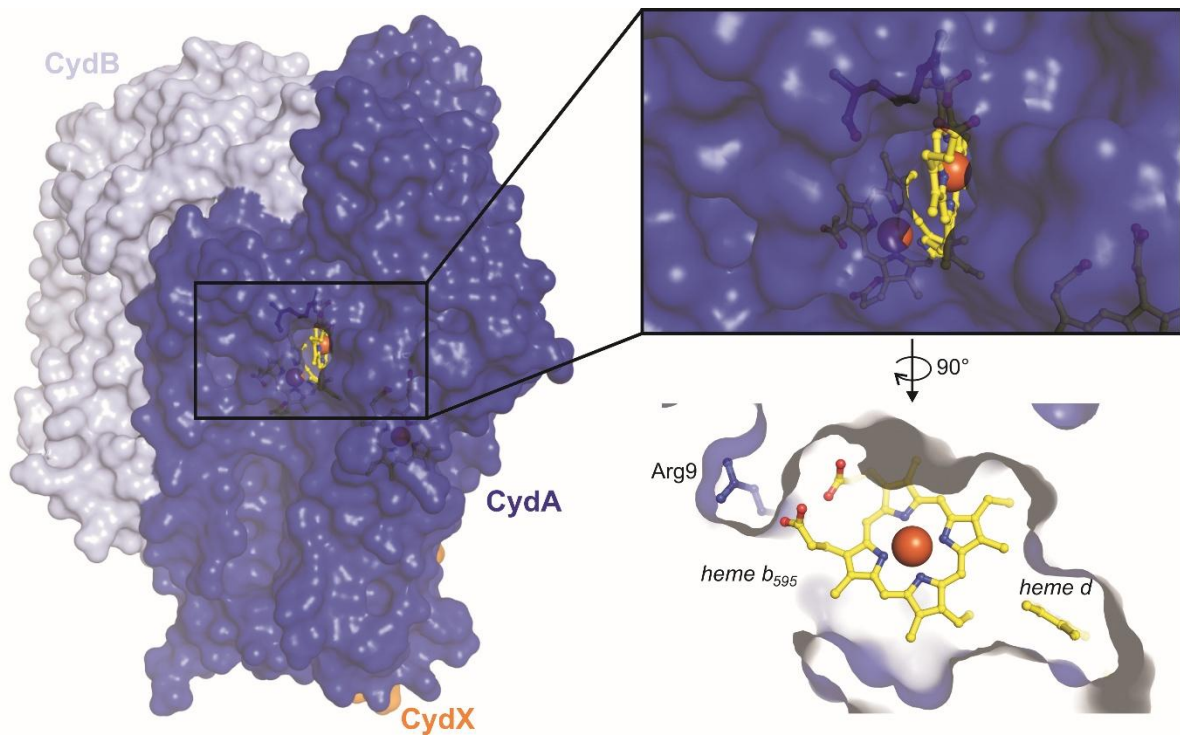

**Supplementary Figure 8 | Conserved substrate channel toward  $b_{595}$ .** Left: View on solvent accessible surface of *bd* oxidase disclosing the substrate channel in CydA leading to heme  $b_{595}$ . Top right: Close-up view on the channel entrance, the entrance features a positive charge, provided by Arg9. Bottom right: cross-section through the substrate channel to  $b_{595}$ . The cavity extends towards heme d, buried deeper inside subunit CydA but not accessible for dioxygen.

### A) HisTrap ff

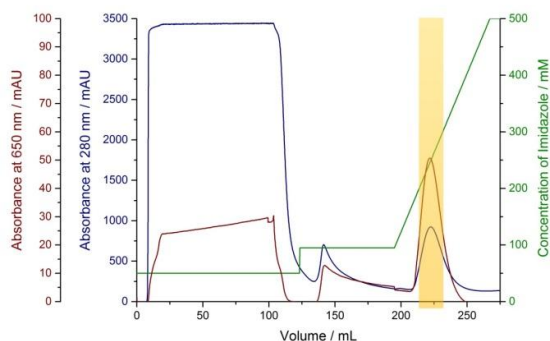

### C) Superose 6 10/300 GL

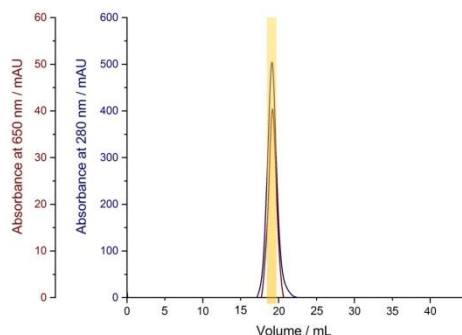

### B) MonoQ 10/100 GL

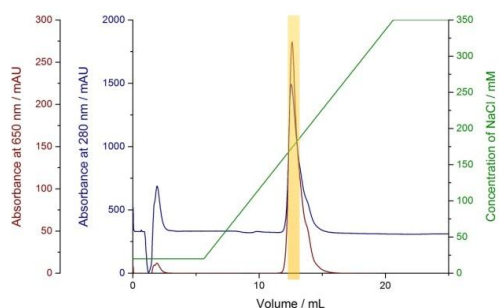

### D) SDS-PAGE

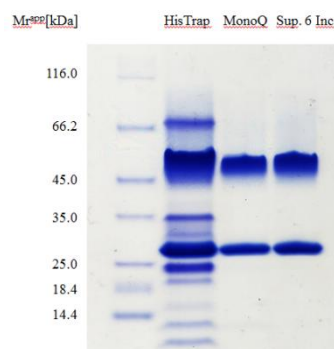

**Supplementary Figure 9 | Preparation of *bd* oxidase from strain *E. coli* BL21\*  $\Delta$ cyo/pET28a *cydA<sub>b</sub>BX*.** The elution profiles from A) HisTrap FF, B) MonoQ 10/100 GL and C) Sepharose 6 10/300 GL are shown. The absorbance at 280 nm is shown in blue, the absorbance at 650 nm in red and any ion gradients in green. The pooled fractions are indicated by the yellow area. D) SDS-PAGE of the preparation. On the left lane, the bands of the protein standard are marked by their individual apparent masses. The pattern of the pooled fractions from the HisTrap FF, the MonoQ 10/100 GL and the Sepharose 6 10/300 GL column are shown in the lanes from left to right.

**Supplementary Table 1 | Cryo-EM parameters and statistics.**

---

|                                                 |           |
|-------------------------------------------------|-----------|
| Data collection:                                |           |
| Voltage (kV)                                    | 300       |
| electron dose (e <sup>-</sup> /Å <sup>2</sup> ) | 59        |
| magnification                                   | 75,000    |
| recording mode                                  | counting  |
| movie frames                                    | 47        |
| defocus range (µm)                              | 1.4-2.2   |
| number of collected movies                      | 8663      |
| Map parameters:                                 |           |
| Final particles (no.)                           | 197,805   |
| symmetry imposed                                | C1        |
| Map resolution (Å)                              | 3.3       |
| FSC threshold                                   | 0.143     |
| Map resolution range (Relion local res.) (Å)    | 3.22-3.84 |
| Map sharpening B factor (Å <sup>2</sup> )       | -88       |
| Model refinement:                               |           |
| Initial model used (PDB code)                   | 5DOQ      |
| Model composition                               |           |
| Non-hydrogen atoms                              | 7347      |
| Protein residues                                | 910       |
| Ligands                                         | 5         |
| B factors (Å <sup>2</sup> )                     |           |
| Protein                                         | 61        |
| Ligand                                          | 57        |
| Validation:                                     |           |
| MolProbity score                                | 1.60      |
| Clashscore                                      | 5.49      |
| Poor rotamers (%)                               | 0.14      |
| R.m.s. deviations                               |           |
| Bond lengths (Å)                                | 0.008     |
| Bond angles (°)                                 | 1.354     |
| Ramachandran plot                               |           |
| Favored (%)                                     | 95.67     |
| Allowed (%)                                     | 4.33      |
| Outliers (%)                                    | 0.00      |

---

**Supplementary Table 2 | Sequences of mutagenic primer.** Exchanged nucleotides, bold; silent mutations, blue; italics, newly generated restriction sites.

| Oligonucleotide | Sequence 5'-3'                                                 |
|-----------------|----------------------------------------------------------------|
| cydB_A82F_fwd   | CTGGCCGATGGTCTATGCCGC <i><b>ATT</b></i> CTTCTCCGGCTTCTATGTGGCG |
| cydB_A82F_rev   | CGCCACATAGAAGCCGGAGAA <i><b>GAA</b></i> TGCGGCATAGACCATCGGCCAG |
| cydB_A137F_fwd  | CGCCGCTGGTAATTGGTGTAT <i><b>TT</b></i> CTTCGGTAACCTGTTGCAGGGC  |
| cydB_A137F_rev  | GCCCTGCAACAGGTTACCGAA <i><b>GAA</b></i> TACACCAATTACCAGCGGCG   |
| cydB_A172F_fwd  | GCTTAACCCGTTCCGGCTGCTG <i><b>TT</b></i> CGGCGTGGTGAGCGTAGGGATG |
| cydB_A172F_rev  | CATCCCTACGCTACCCACGCC <i><b>GAA</b></i> CAGCAGGCCGAACGGGTTAAGC |
| cydA_E74F_fwd   | GTGGCTACCGGTCTGACCATG <i><b>TT</b></i> CTCCAGTTCGGGACTAACTGG   |
| cydA_E74F_rev   | GTTAGTCCCGAACTGGA <i><b>GAA</b></i> CATGGTCAGACCGGTAGCCAC      |
